# Supplementary material for: Eco-fabrication of hierarchical porous silica monoliths by ice-templating of rice husk ash
Source: Royal Society of Chemistry journal article supplement (doi:10.1039/c6gc02153k), 2016-11-23
Supplement: c6gc02153k1.pdf [file c6gc02153k1.pdf]

Electronic Supporting Information

**Eco-fabrication of Hierarchical Porous Silica Monoliths by Ice-Templating of Rice Husk Ash**

A. Bahrami<sup>a,b</sup>, U. Simon<sup>a</sup>, N. Soltani<sup>a,b</sup>, S. Zavareh<sup>a</sup>, J. Schmidt<sup>c</sup>, M. I. Pech-Canul<sup>b</sup>, A. Gurlo<sup>a</sup>

<sup>a</sup>*Fachgebiet Keramische Werkstoffe / Chair of Advanced Ceramic Materials, Institut für Werkstoffwissenschaften und -technologien, Technische Universität Berlin, Hardenbergstraße 40, 10623 Berlin, Germany.*

<sup>b</sup>*Centro de Investigación y de Estudios Avanzados del IPN Unidad Saltillo, Ave. Industria Metalúrgica No. 1062, Parque Industrial Saltillo-Ramos Arizpe, Ramos Arizpe, Coahuila, México, 25900.*

<sup>c</sup>*Fachgebiet Funktionsmaterialien, Institut für Chemie, Sekr. BA 2, Technische Universität Berlin, Hardenbergstr. 40, 10623, Berlin, Germany.*

**Table ESI-1. Chemical composition (wt. %) and density of rice husk, ARHA and CRHA**

|             | Fe <sub>2</sub> O <sub>3</sub> | Al <sub>2</sub> O <sub>3</sub> | Na <sub>2</sub> O | K <sub>2</sub> O | SO <sub>3</sub> | P <sub>2</sub> O <sub>5</sub> | MgO    | Other species | SiO <sub>2</sub> | Density<br>(g/cm <sup>3</sup> ) |
|-------------|--------------------------------|--------------------------------|-------------------|------------------|-----------------|-------------------------------|--------|---------------|------------------|---------------------------------|
| <b>RH</b>   | 0.037                          | 0.28                           | 0.13              | 0.38             | 0.083           | 0.18                          | 0.24   | 80.4          | 17.5             | ---                             |
| <b>ARHA</b> | 0.0264                         | 0.042                          | 0.081             | 0.021            | 0.242           | 0.047                         | 0.0691 | 0.902         | 98.57            | 1.60                            |
| <b>CRHA</b> | 0.0359                         | 0.078                          | 0.236             | 0.321            | 0.112           | 0.317                         | 0.297  | 2.474         | 96.45            | 2.57                            |

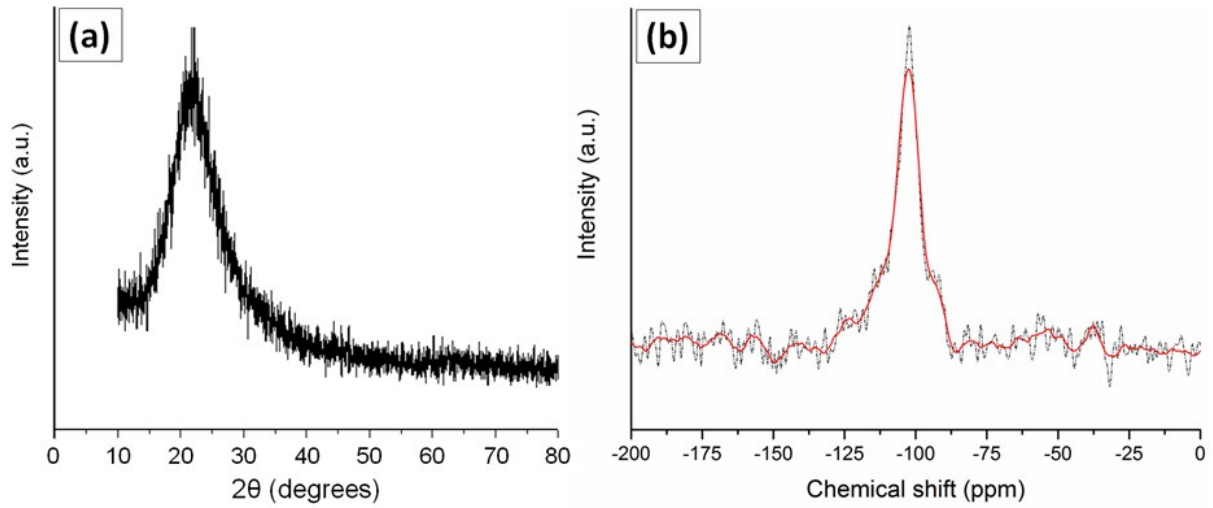

Figure ESI-1. a) XRD pattern and b) Si-NMR of amorphous silica.

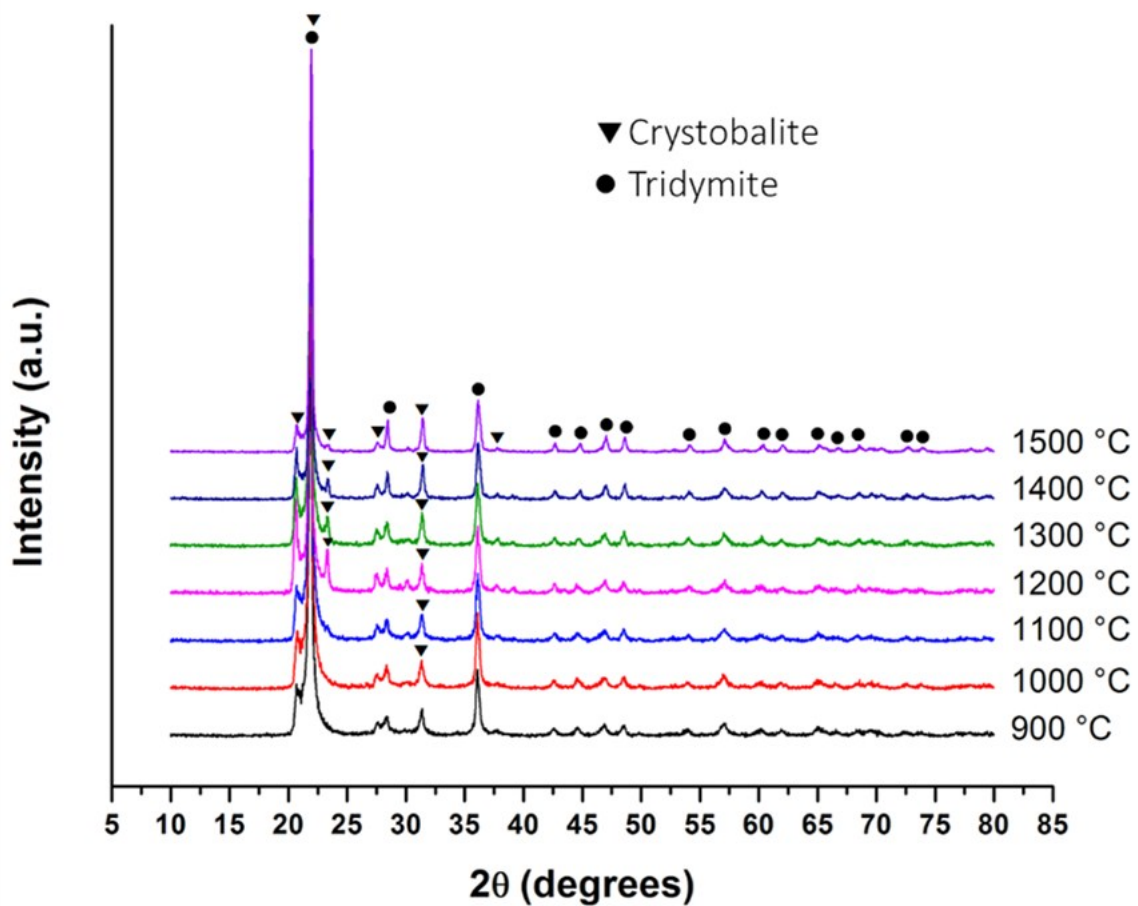

Figure ESI-2. XRD patterns of amorphous and crystalline rice husk ash (CRHA) after heat-treatment at under air for 2 hours.
